# Supplementary material
Source: publisher figshare collection journal article supplement (https://acs.figshare.com/ndownloader/files/12809585)
Supplement: Supplementary file 1 [file 12809585]

Supporting Information

for

**Hunting for organic molecules with artificial intelligence:**

**Molecules optimized for desired excitation energies**

Masato Sumita<sup>\*,†,‡</sup>, Xiufeng Yang<sup>†,‡</sup>, Shinsuke Ishihara<sup>#</sup>, Ryo Tamura<sup>‡,¶</sup>, and

Koji Tsuda<sup>\*†,‡,¶</sup>

<sup>†</sup>*Center for Advanced Intelligence Project, RIKEN, 1-4-1 Nihombashi, Chuo-ku, Tokyo, 103-0027, Japan.* <sup>#</sup>*International Center for Materials Nanoarchitectonics (WPI-MANA), National Institute for Materials Science, 1-1 Namiki, Tsukuba, Ibaraki, 305-0044, Japan.* <sup>‡</sup>*Graduate School of Frontier Sciences, The University of Tokyo, 5-1-5 Kashiwa-no-ha, Kashiwa, Chiba, 277-8561, Japan.* <sup>¶</sup>*Research and Services Division of Materials Data and Integrated System, National Institute for Materials Science, 1-2-1 Sengen, Tsukuba, Ibaraki, 305-0047, Japan.*

Correspondence and requests for materials should be addressed to M. S. (email: masato.sumita@riken.jp) or to K. T. (email: tsuda@k.u-tokyo.ac.jp)

## 1. Materials

Compound **I** (2-methyl-oxazole) is commercially available and was purchased from J&W Pharmlab LLC (catalog No. 56R0594). Compound **II** (1,2-dimethyl-1H-imidazol-5-ol), compound **III** (4-methyl-6-quinolinol), compound **IV** (5-methylnaphthalene-2-ol) and compound **VI** (1-(dimethylamino)-2,3-butanedione) were obtained from Tokyo Chemical Industry Co., Ltd. (TCI) upon custom synthesis. Compound **V** (N-(2-hydroxybenzyl)-N-methylnitrous amide) was obtained from HeBei Sundia Meditech Company, Ltd. upon custom synthesis. All chemical compounds obtained by custom synthesis satisfy reagent-grade purity (> 96 %), and were used as received.

## 2. Characterization

**Compound II:**  $^1\text{H}$ -NMR (in  $\text{CDCl}_3$ ) in ppm: 4.04 (q, 2H,  $\text{CH}_2$ ), 3.05 (s, 3H,  $\text{CH}_3$ ), 2.20 (t, 3H,  $\text{CH}_3$ ).  $^{13}\text{C}$ -NMR (in  $\text{CDCl}_3$ ) in ppm: 181.2, 163.2, 58.3, 26.4, 15.9. LC-MS ( $m/z$ ): calculated for  $[\text{C}_5\text{H}_8\text{N}_2\text{O}] = 112.06$   $m/z$ , found 113.3  $m/z$  ( $\text{M}+\text{H}^+$ ). Purity (GC): 98.9%. Note that  $^1\text{H}$ - and  $^{13}\text{C}$ -NMR spectra indicate that compound **II** mainly exist as keto-form in tautomerism.

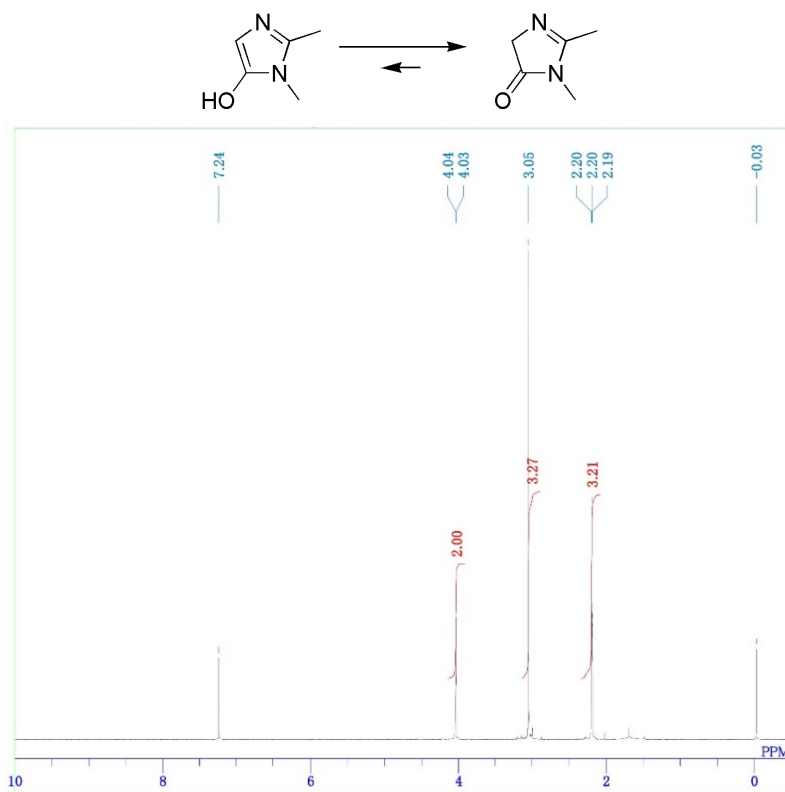

**Figure S1.**  $^1\text{H}$ -NMR spectrum of compound **II** (as prepared). This chart is measured by TCI that performed custom synthesis and shown with permission from TCI.

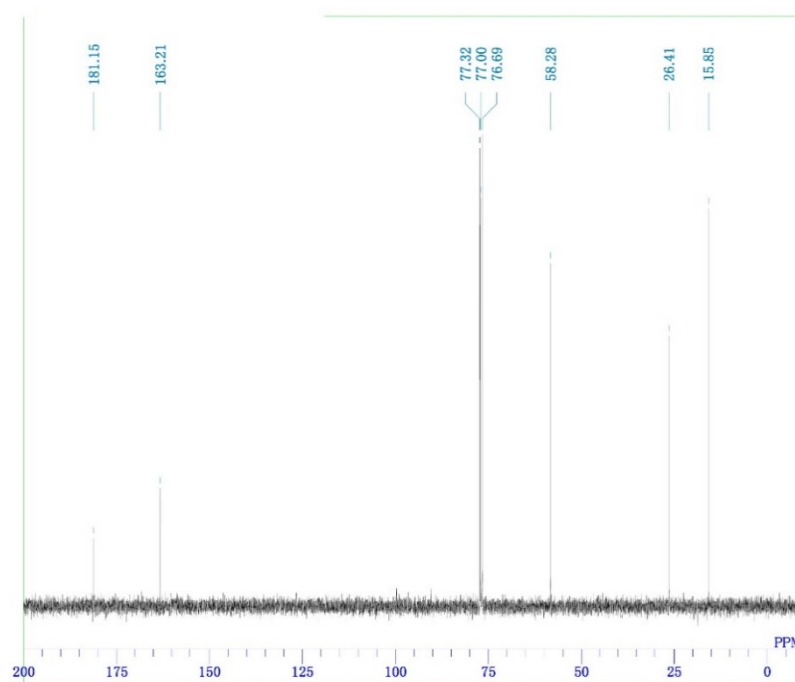

**Figure S2.**  $^{13}\text{C}$ -NMR spectrum of compound **II** (as prepared). This chart is measured by TCI that performed custom synthesis and shown with permission from TCI.

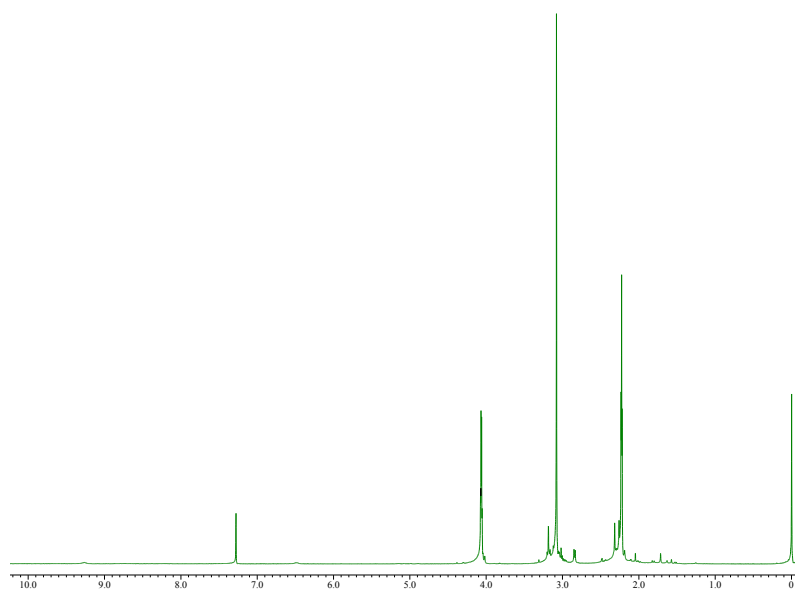

**Figure S3.**  $^1\text{H}$ -NMR spectrum of compound **II** measured in two weeks after the reagent bottle was opened in air for taking out sample. After the bottle was opened, the bottle was securely sealed and stored at  $-20\text{ }^{\circ}\text{C}$  for two weeks. Compared with  $^1\text{H}$ -NMR spectra of as-prepared compound, signals from some impurities are observed beside main signals around 2.0–3.5 ppm. This chart is measured by authors using AL300 BX NMR spectrometer (JEOL, Tokyo, Japan).

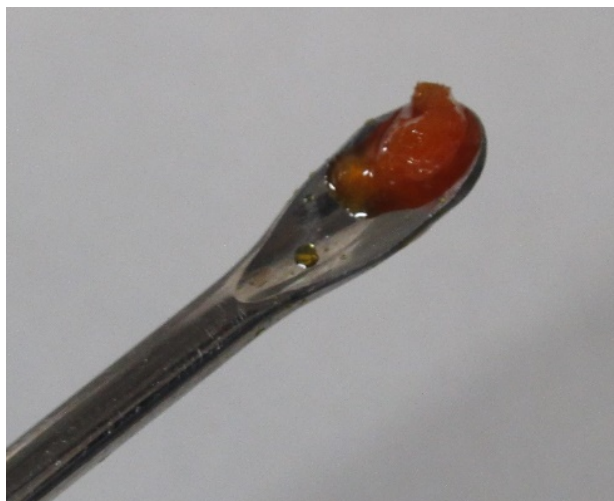

**Figure S4.** Photograph of compound **II**.

**Compound III:**  $^1\text{H}$ -NMR (in  $\text{DMSO-d}_6$ ) in ppm: 10.04 (s, 1H, OH), 8.56 (s, 1H, ArH), 7.89 (d, 1H, ArH), 7.34-7.25 (m, 3H, ArH), 2.60 (s, 3H,  $\text{CH}_3$ ).  $^{13}\text{C}$ -NMR (in  $\text{DMSO-d}_6$ ) in ppm: 156.4, 147.7, 143.6, 142.7, 132.0, 130.1, 122.8, 122.3, 106.0, 19.2. LC-MS (m/z): calculated for  $[\text{C}_{10}\text{H}_9\text{NO}] = 159.07$  m/z, found 160.2 m/z ( $\text{M}+\text{H}^+$ ). Purity (GC): 96.6%.

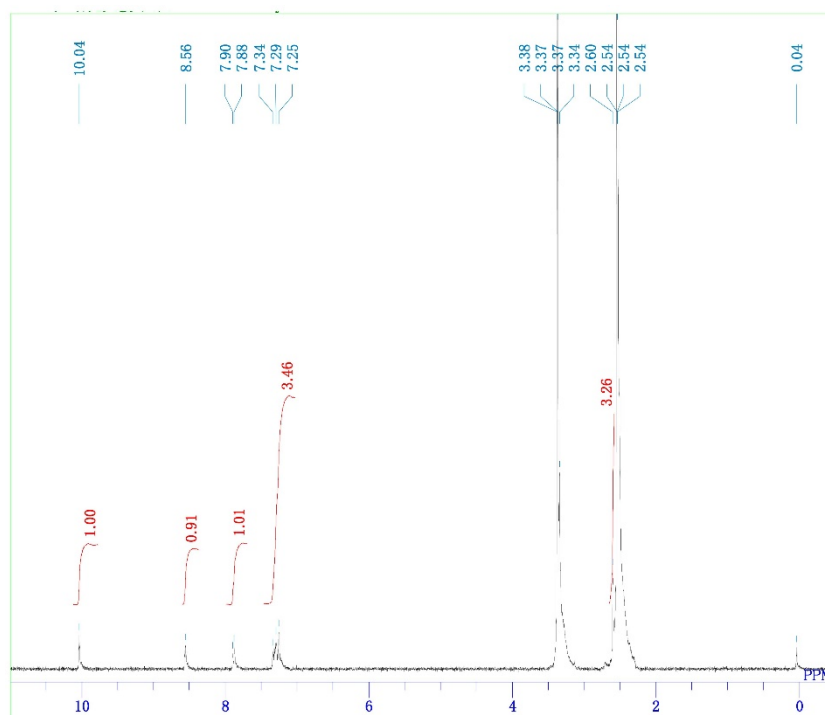

**Figure S5.**  $^1\text{H}$ -NMR spectrum of compound **III**. This chart is measured by TCI that performed custom synthesis and shown with permission from TCI.

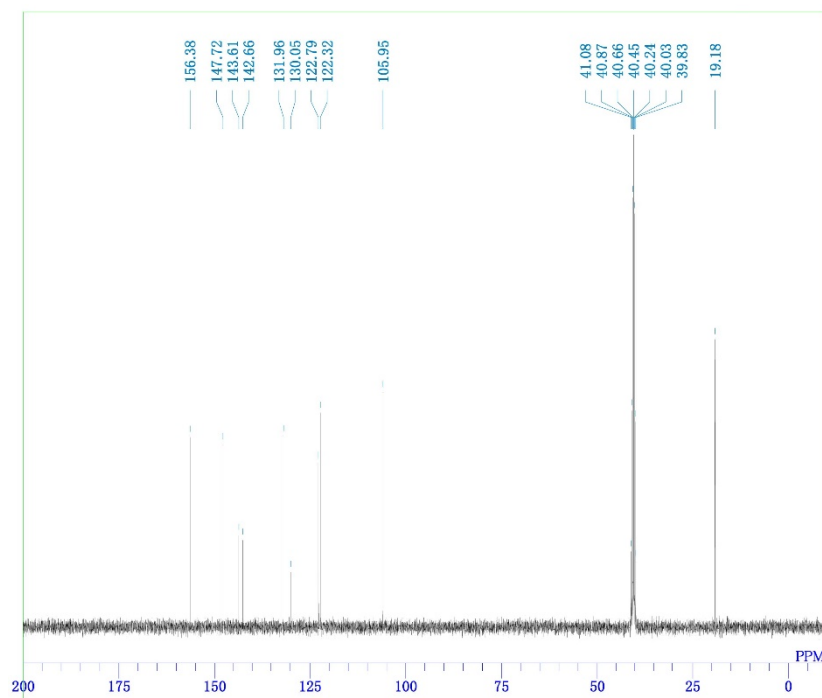

**Figure S6.**  $^{13}\text{C}$ -NMR spectrum of compound **III**. This chart is measured by TCI that performed custom synthesis and shown with permission from TCI.

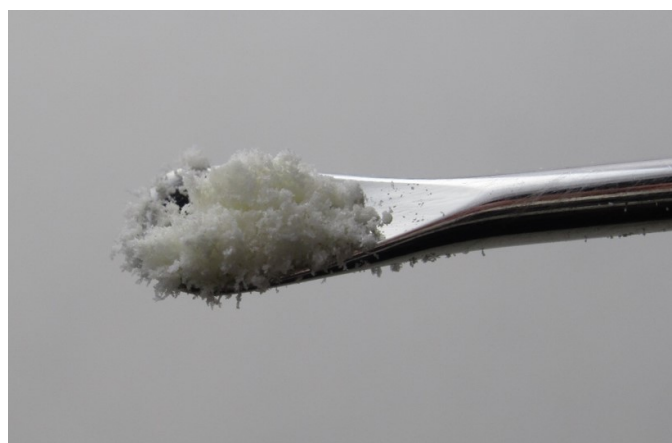

**Figure S7.** Photograph of compound **III**.

**Compound IV:**  $^1\text{H}$ -NMR (in  $\text{CDCl}_3$ ) in ppm: 7.90 (d, 1H, ArH), 7.53 (d, 1H, ArH), 7.31 (t, 1H, ArH), 7.16-7.10 (m, 3H, ArH), 4.87 (br, 1H, OH), 2.64 (s, 3H,  $\text{CH}_3$ ).  $^{13}\text{C}$ -NMR (in  $\text{CDCl}_3$ ) in ppm: 153.0, 134.8, 134.3, 128.1, 126.4, 126.2, 124.9, 124.5, 117.3, 110.2, 19.4. LC-MS ( $m/z$ ): calculated for  $[\text{C}_{11}\text{H}_{10}\text{O}] = 158.07$   $m/z$ , found 159.0  $m/z$  ( $\text{M}+\text{H}^+$ ). Purity (LC): 99.5%.

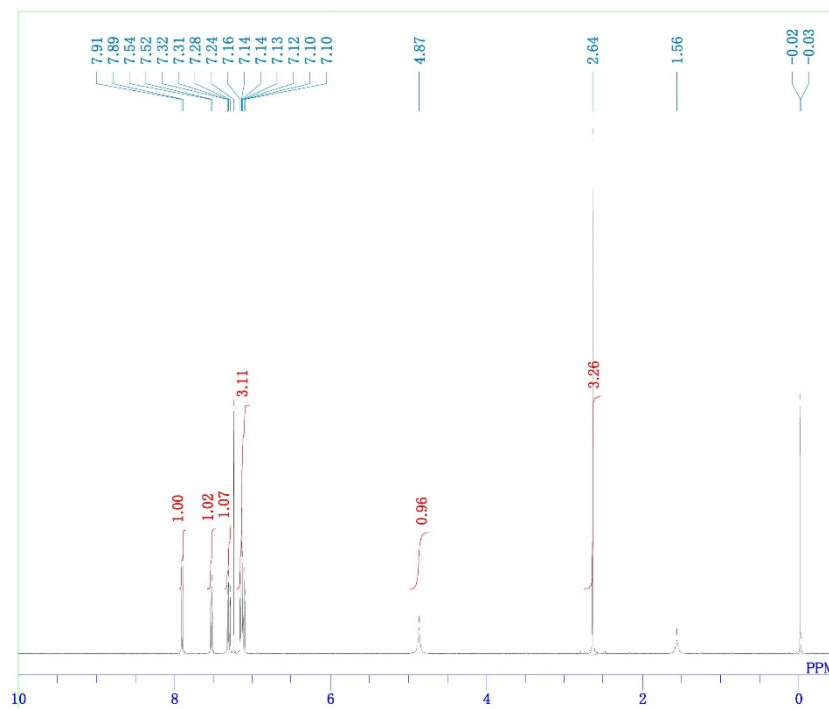

**Figure S8.**  $^1\text{H}$ -NMR spectrum of compound **IV**. This chart is measured by TCI that performed custom synthesis and shown with permission from TCI.

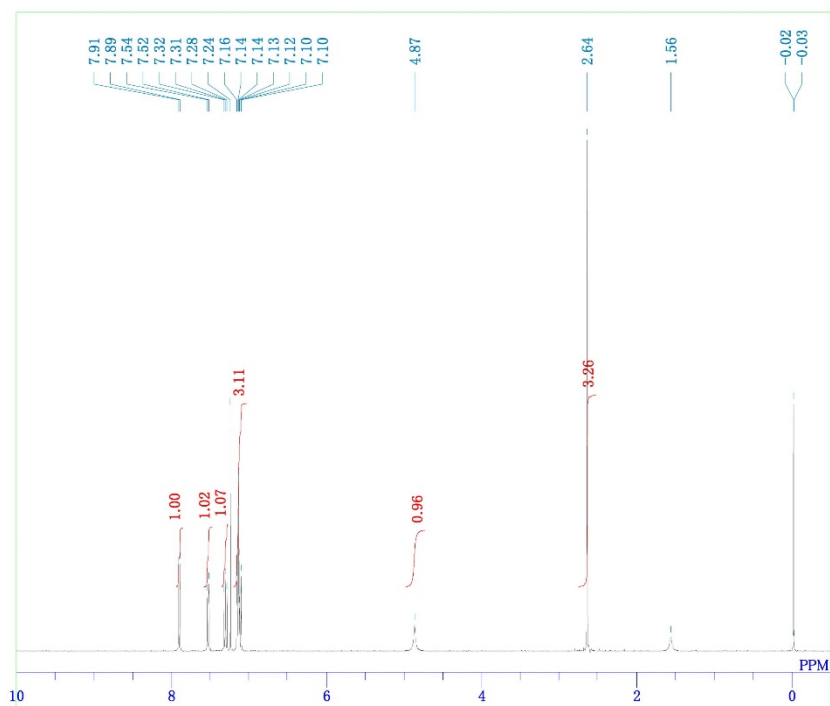

**Figure S9.**  $^{13}\text{C}$ -NMR spectrum of compound **IV**. This chart is measured by TCI that performed custom synthesis and shown with permission from TCI.

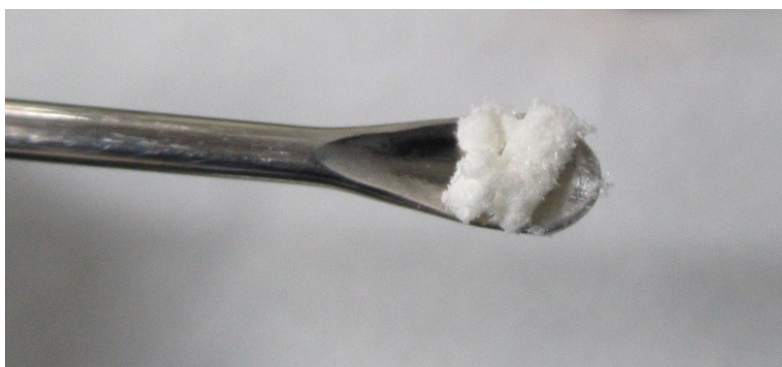

**Figure S10.** Photograph of compound **IV**.



**Compound V:**  $^1\text{H}$ -NMR (in DMSO- $d_6$ ) in ppm: 9.79 (s, 1H, OH), 7.17 (t, 1H, ArH), 7.09 (d, 1H, ArH), 6.87 (d, 1H, ArH), 6.80 (t, 1H, ArH), 5.26 (s, 2H, benzyl- $\text{CH}_2$ ), 2.89 (s, 3H,  $\text{CH}_3$ ).  $^{13}\text{C}$ -NMR (in DMSO- $d_6$ ) in ppm: 156.6, 129.9, 129.4, 121.1, 119.2, 115.4, 51.7, 31.1. LC-MS ( $m/z$ ): calculated for  $[\text{C}_8\text{H}_{10}\text{N}_2\text{O}_2] = 166.07$   $m/z$ , found 167.0  $m/z$  ( $\text{M}+\text{H}^+$ ). Purity (LC): 99.2%.

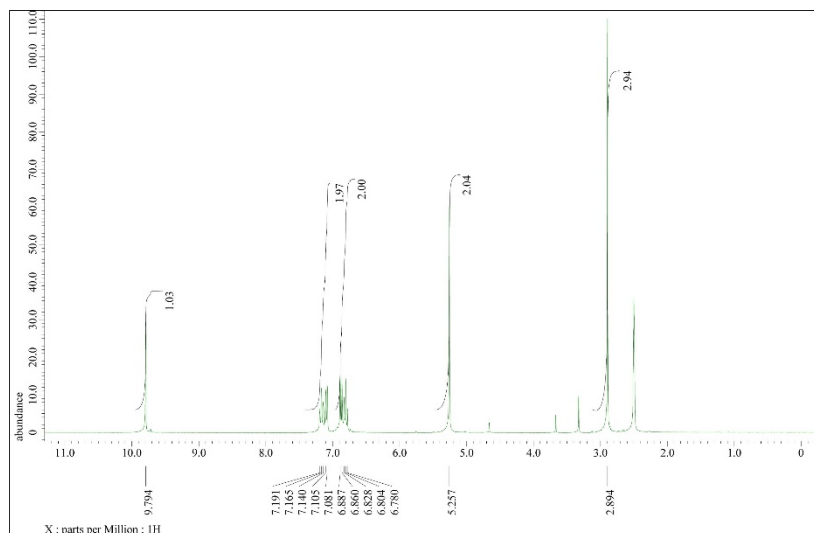

**Figure S11.**  $^1\text{H}$ -NMR spectrum of compound **V**. This chart is measured by authors using AL300 BX NMR spectrometer (JEOL, Tokyo, Japan).

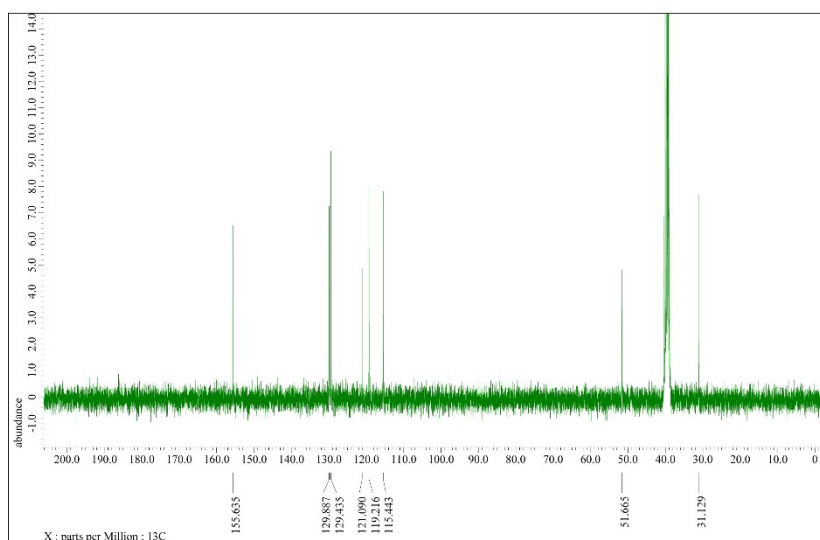

**Figure S12.**  $^{13}\text{C}$ -NMR spectrum of compound **V**. This chart is measured by authors using AL300 BX NMR spectrometer (JEOL, Tokyo, Japan).

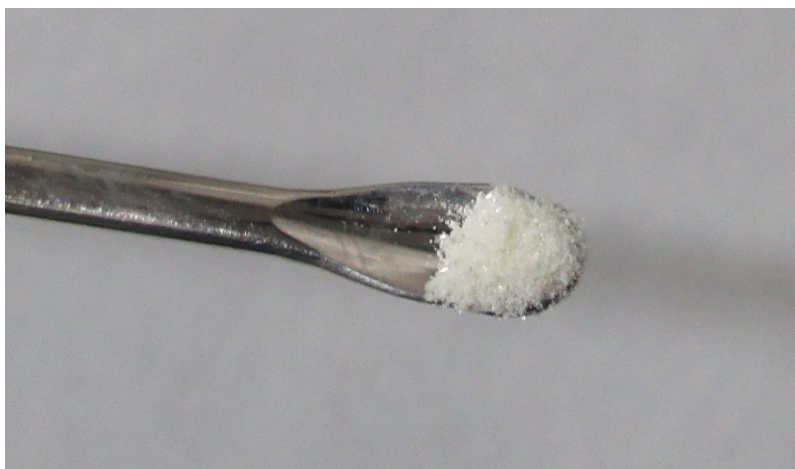

**Figure S13.** Photograph of compound V.

**Compound VI:**  $^1\text{H}$ -NMR (in  $\text{CDCl}_3$ ) in ppm: 6.31 (s, 1H,  $\text{C}=\text{CH}$ ), 6.2-6.0 (br, 0.5H, OH), 3.10 (s, 6H,  $\text{N}(\text{CH}_3)_2$ ), 2.14 (s, 3H,  $\text{CH}_3$ ).  $^{13}\text{C}$ -NMR (in  $\text{CDCl}_3$ ) in ppm: 187.9, 132.6, 130.0, 42.3, 21.2. LC-MS ( $m/z$ ): calculated for  $[\text{C}_6\text{H}_{11}\text{NO}_2] = 129.08$   $m/z$ , found 130.4  $m/z$  ( $\text{M}+\text{H}^+$ ). Purity (GC): 96.9%. Note that  $^1\text{H}$ - and  $^{13}\text{C}$ -NMR spectra indicate that compound **VI** mainly exist as enol-form in tautomerism.

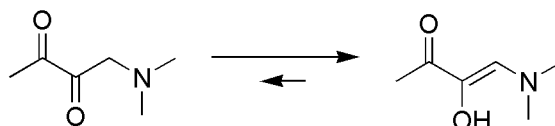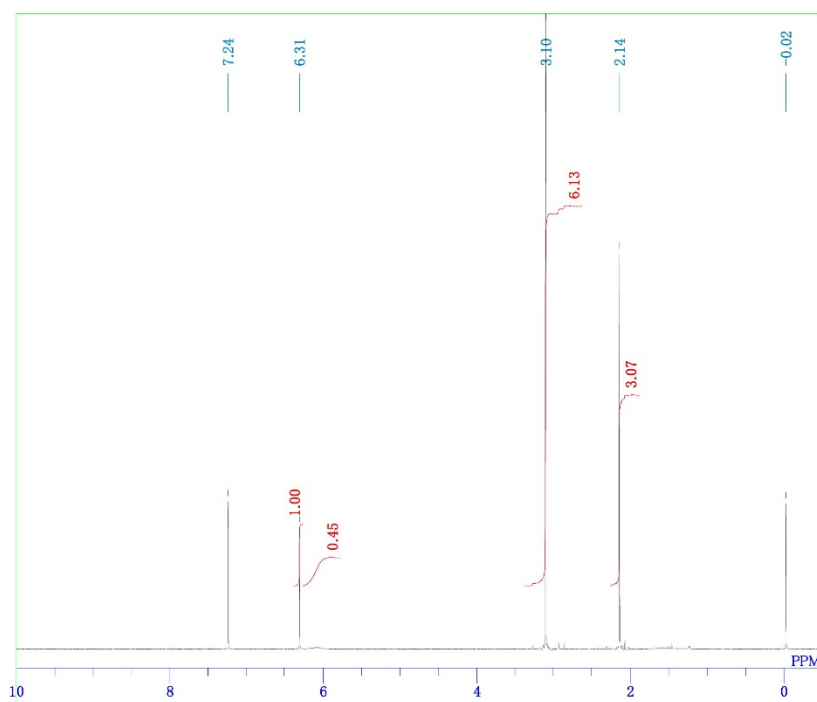

**Figure S14.**  $^1\text{H}$ -NMR spectrum of compound **VI**. This chart is measured by TCI that performed custom synthesis and shown with permission from TCI.

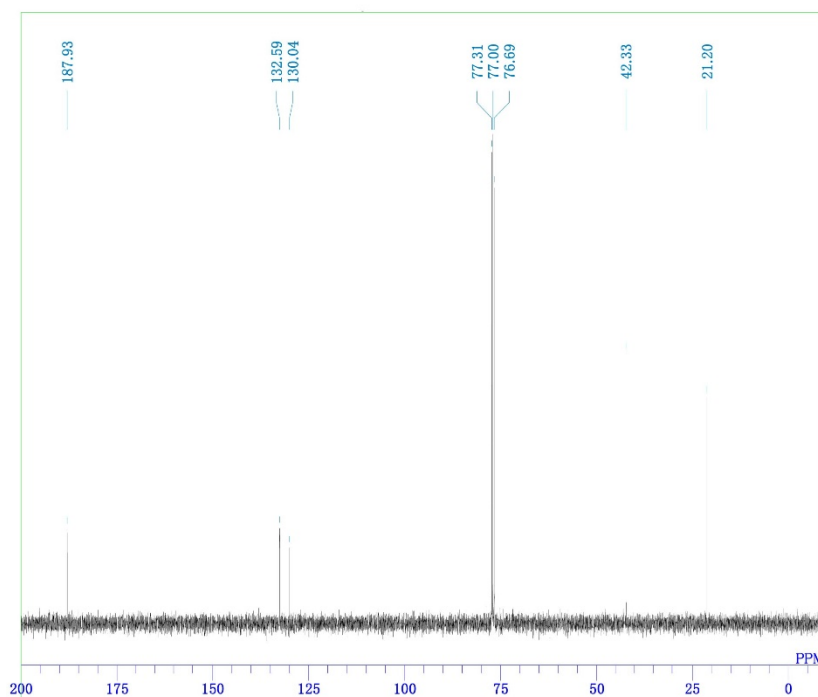

**Figure S15.**  $^{13}\text{C}$ -NMR spectrum of compound **VI**. This chart is measured by TCI that performed custom synthesis and shown with permission from TCI.

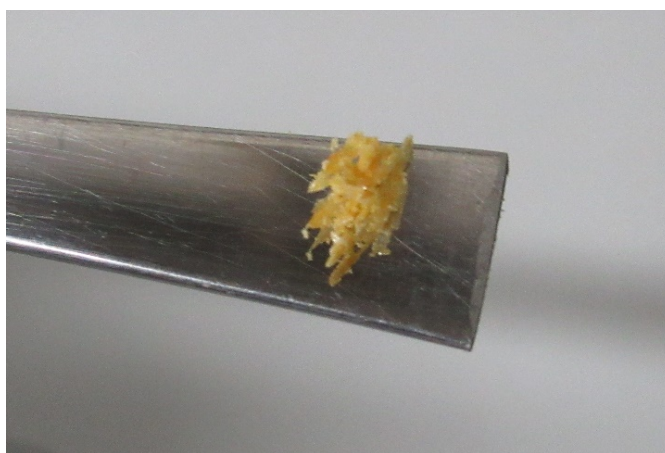

**Figure S16.** Photograph of compound **VI**.

**Table S1.** Energies of keto/enol-form of **II**

|                                        | Keto       | Enol       |
|----------------------------------------|------------|------------|
| Energy / $E_h$                         | -377.99028 | -377.96296 |
| Relative energy / $\text{kJ mol}^{-1}$ | 0.0        | 71.72      |

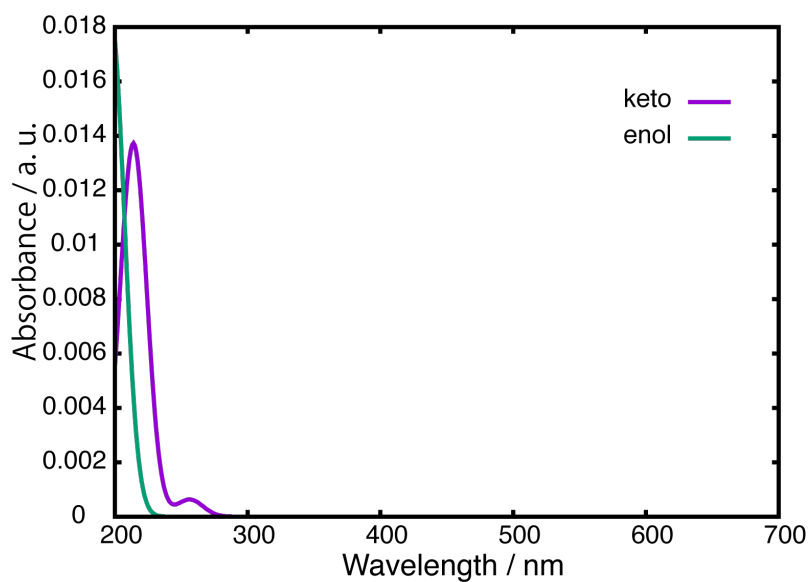**Figure S17.** Computational UV-vis spectra for keto/enol-forms of **II**.**Table S2.** Energies of syn/anti-conformers in keto/enol-forms of **VI**

|                                        | syn        | anti       |
|----------------------------------------|------------|------------|
| keto                                   |            |            |
| Energy / $E_h$                         | -437.99645 | -438.01127 |
| Relative energy / $\text{kJ mol}^{-1}$ | 62.62      | 23.71      |
| enol                                   |            |            |
| Energy / $E_h$                         | -438.02030 | -438.01697 |
| Relative energy / $\text{kJ mol}^{-1}$ | 0.0        | 8.74       |

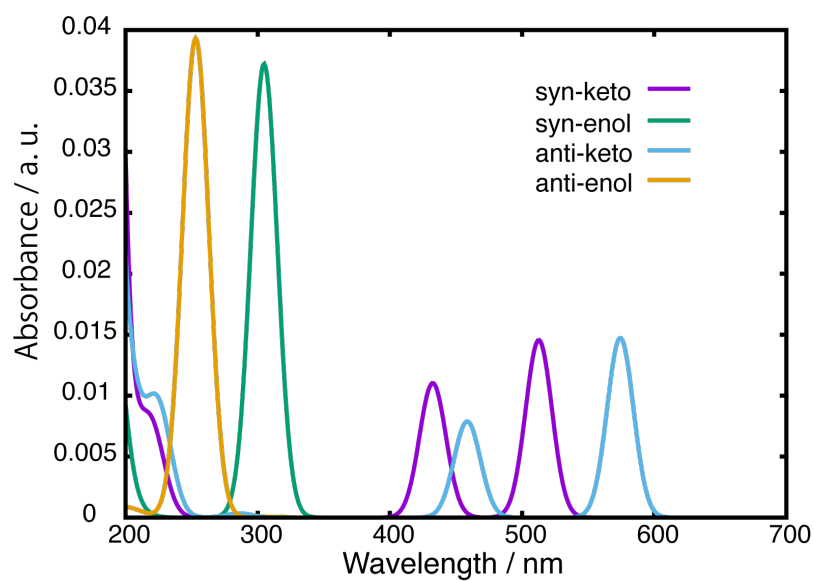

**Figure S18.** Computational UV-vis spectra keto/enol-forms of **VI**

### 3. Dependence of solvent and concentration

#### Compound I

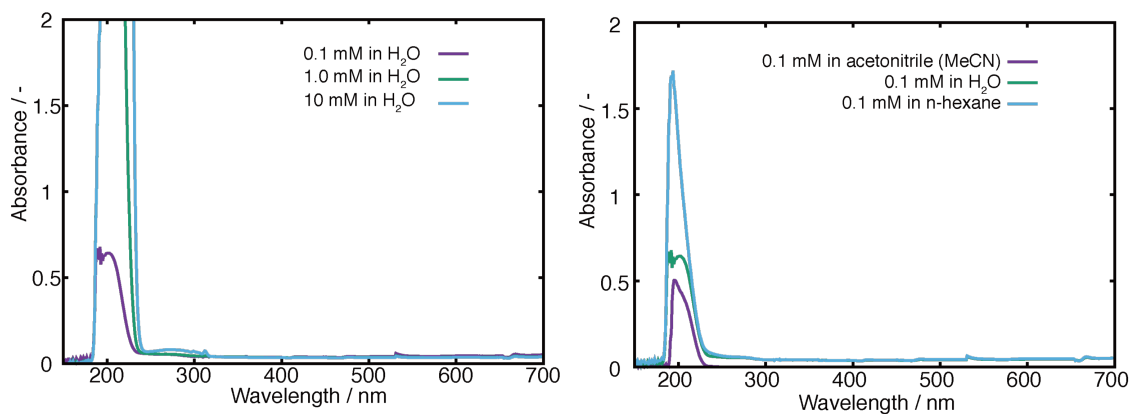

**Figure S19.** Experimental UV-vis absorption spectra of **I** with various concentration and solvent.

#### Compound II

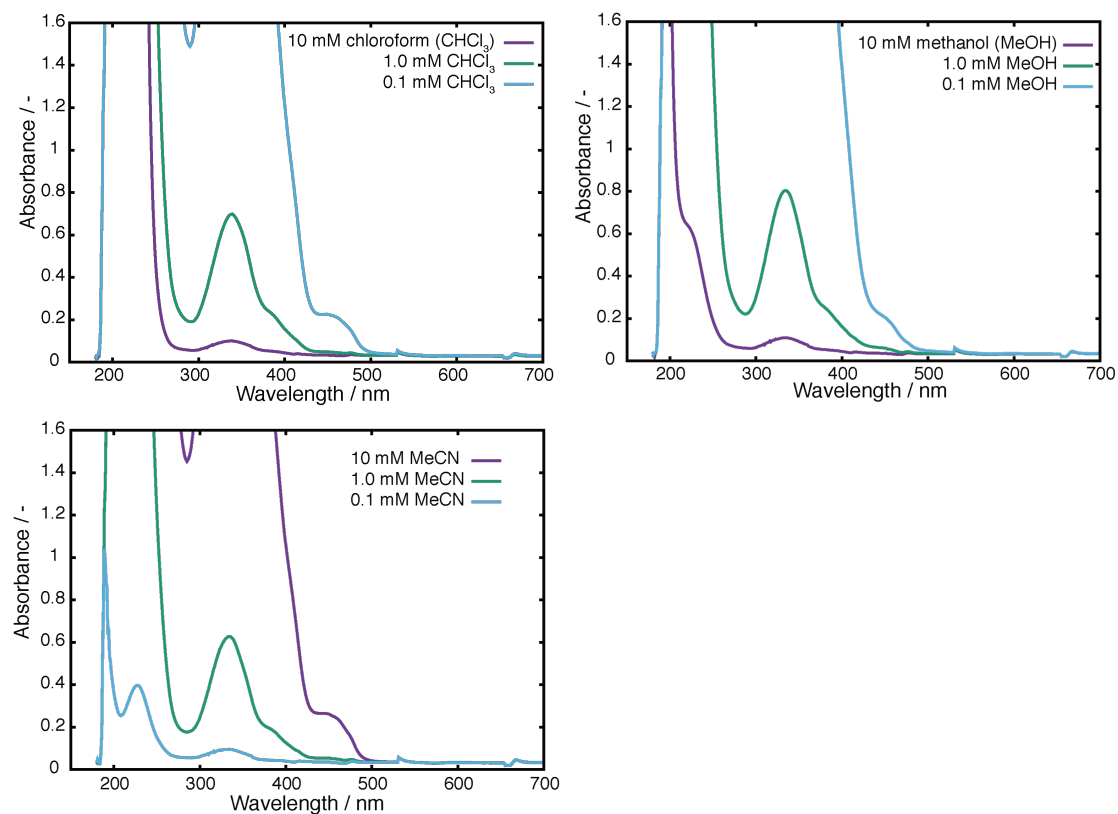

**Figure S20.** Experimental UV-vis absorption spectra of **II** with various concentration and solvent.

### Compound III

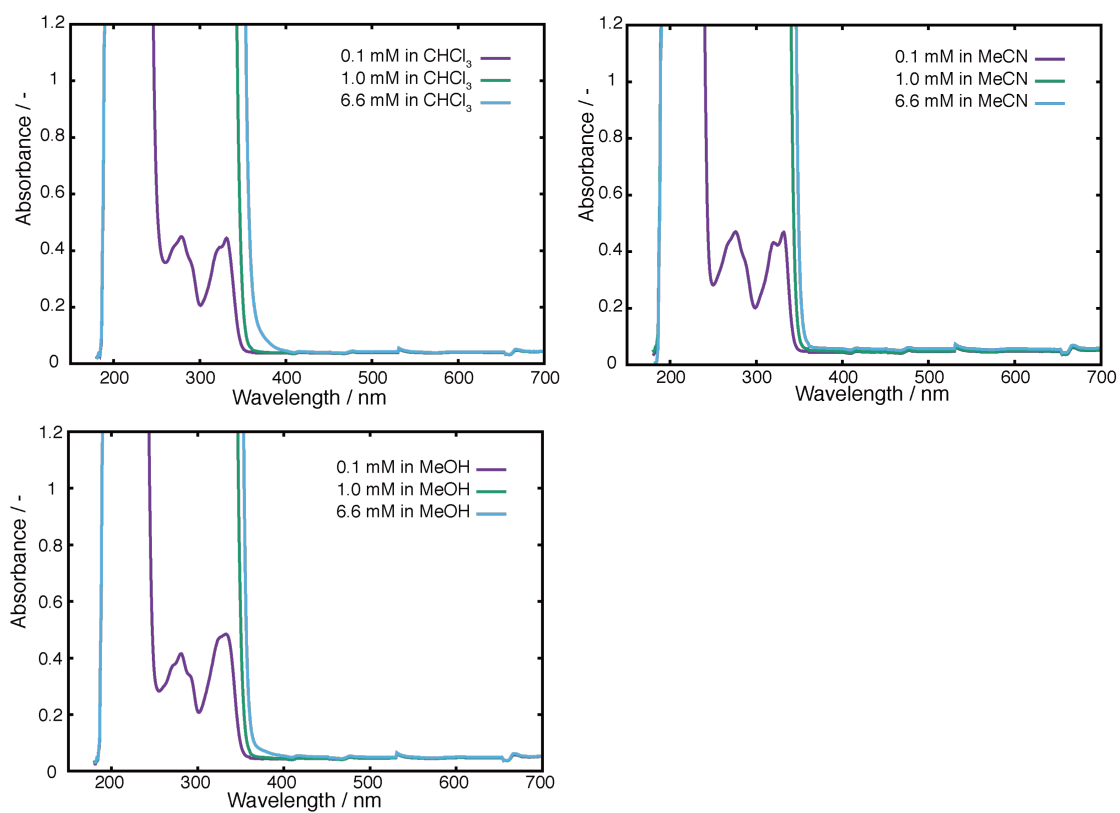

**Figure S21.** Experimental UV-vis absorption spectra of **III** with various concentration and solvent.



## Compound IV

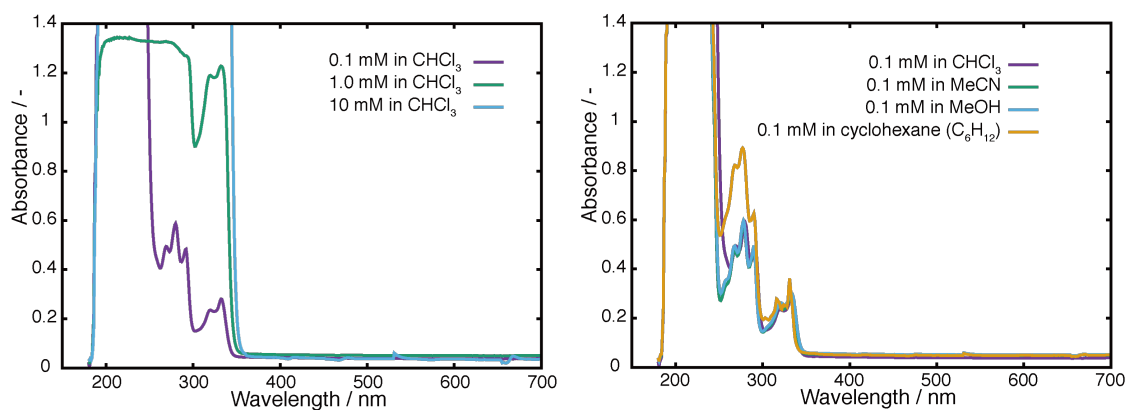

**Figure S22.** Experimental UV-vis absorption spectra of **IV** with various concentration and solvent.

## Compound V

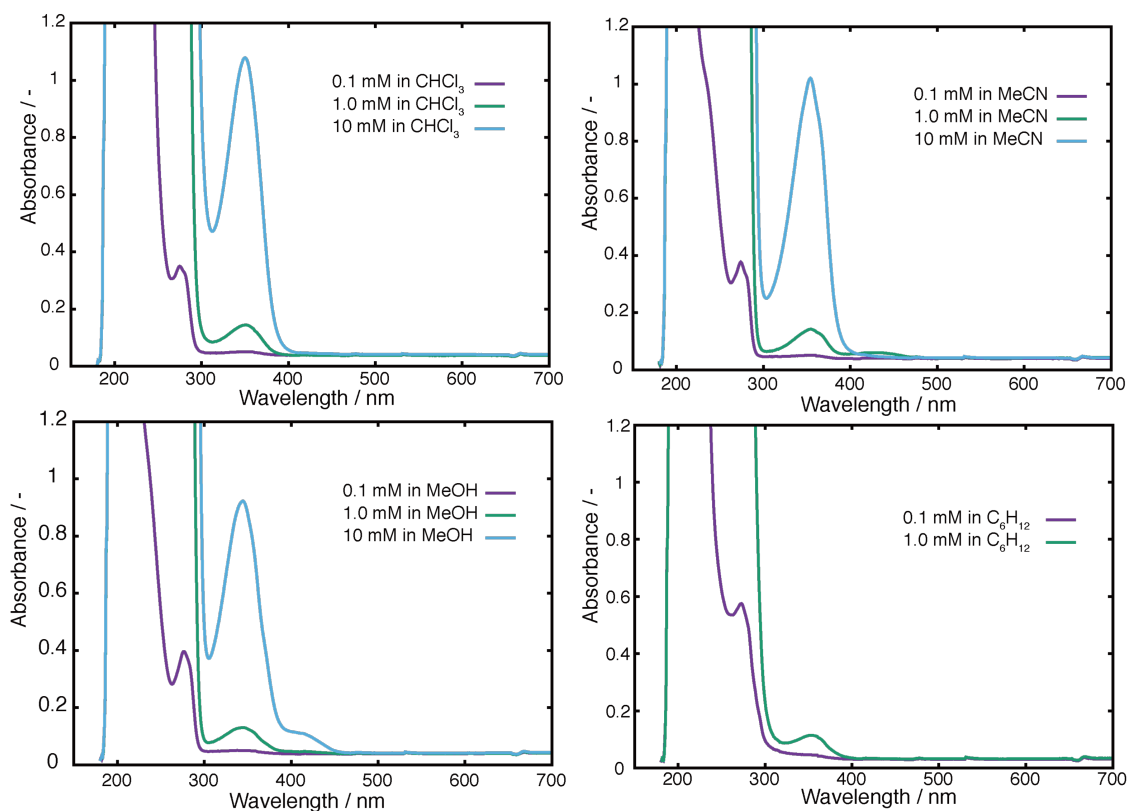

**Figure S23.** Experimental UV-vis absorption spectra of **V** with various concentration and solvent.

## Compound VI

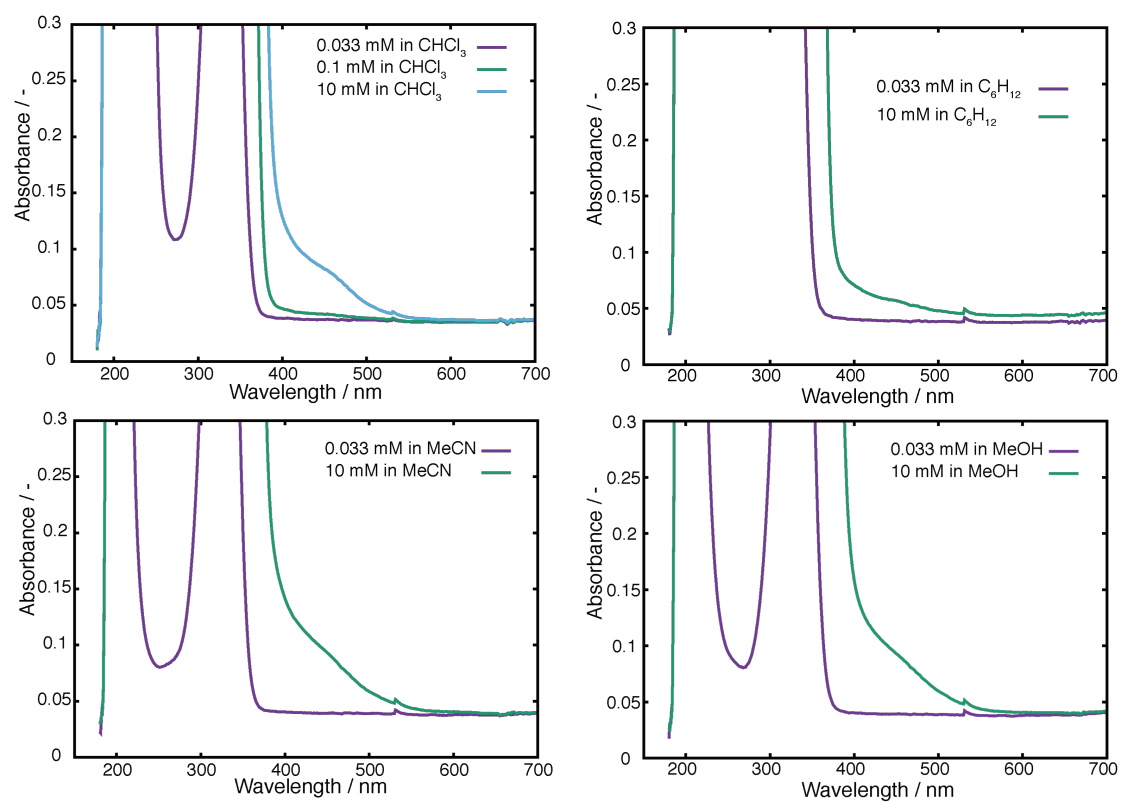

**Figure S24.** Experimental UV-vis absorption spectra of **VI** with various concentration and solvent.
